# Supplementary material for: TCN2 promotes psoriatic skin inflammation and keratinocyte proliferation via the IL-1β-STAT3 pathway
Source: Research Square preprint supplement (doi:10.21203/rs.3.rs-7309098/v1), 2025-08-19
Supplement: Supplementary file 1 [file 6ac9cf741185801222e24dea.xlsx]

## Sheet: Supplementary table1
Supplementary Table1 Characteristics of psoriasis patients and healthy controls
Number	Sex	Age	PASI score	PASI score after 6 months of treatment with Secukinumab
PS 1	M	43	30.1	0
PS 2	F	35	24.1	0
PS 3	F	33	21.5	0.4
PS 4	M	29	27.3	0.3
PS 5	F	66	21.5	0
PS 6	M	28	25.3	0.4
PS 7	F	64	27.9	0.4
PS 8	F	70	30.8	12
PS 9	F	43	15.3	0
PS 10	M	71	28	0.3
PS 11	M	48	31	3.5
PS 12	F	73	26.3	1.1
PS 13	M	18	30.4	0.5
PS 14	M	40	31.2	0.2
PS 15	M	56	29.4	-
PS 16	M	51	32.3	-
PS 17	F	42	25.2	-
PS 18	M	52	23.9	-
PS 19	M	60	36.8	-
PS 20	F	68	25.7	-
PS 21	M	65	30.6	-
PS 22	F	40	31	-
PS 23	M	63	25.3	-
PS 24	M	74	28.5	-
PS 25	F	65	29.1	-

## Sheet: Supplementary table2
Supplementary table2 DEGs among the WT mice, WT + IMQ mice and T-/- + IMQ mice groups
Gene	Ctr_1	Ctr_2	Ctr_3	Pso_1	Pso_2	Pso_3	Pso_4	Pso_5	T2ho_1	T2ho_2	T2ho_3	T2ho_4	log2FoldChange Ctr_Pso	pvalue Ctr_Pso	padj Ctr_Pso	log2FoldChage Pso_T2ho	pvalue Pso_T2ho	padj Pso_T2ho
Gm15446	347	277	330	214	164	195	254	227	7	25	8	8	-4.6217	4.42187e-35	9.62774e-31	-4.1362	2.04222e-26	1.11189e-22
Fam25c	721	921	787	1481	1833	1943	2045	2997	7143	4501	6446	3669	2.85638	2.3847e-24	1.03844e-20	1.40486	1.47153e-06	0.000246515
Il18r1	349	687	512	105	209	67	122	89	25	22	33	20	-4.26093	4.84251e-21	1.17151e-17	-2.23629	9.35065e-09	3.08543e-06
Ear2	106	383	913	98	31	57	264	91	9	1	5	6	-6.37998	4.24808e-16	5.13853e-13	-4.37461	2.15338e-10	1.17881e-07
Tcn2	362	1351	1513	1550	1141	2254	2145	2350	94	32	88	71	-3.8144	3.61055e-15	3.30242e-12	-4.72645	6.97906e-40	1.5199e-35
Klrk1	53	337	282	55	125	19	97	40	11	4	4	6	-5.06965	6.44736e-14	5.01352e-11	-3.42713	2.41433e-08	7.1053e-06
Gm20234	55	656	365	12	51	4	1	2	0	0	0	0	-10.8333	1.79285e-13	1.25922e-10	-6.23445	7.69543e-05	0.00583941
H2-Eb1	1065	5954	7632	1178	1891	2219	2487	2247	588	174	126	251	-4.01142	8.74519e-12	4.42812e-09	-2.82437	9.91666e-11	6.54439e-08
Cd74	2060	16332	25779	4607	6128	7522	10010	7161	1467	404	252	588	-4.35483	1.2055e-11	5.70596e-09	-3.39709	3.42701e-13	4.14631e-10
Ccr2	134	1628	3467	878	1476	1197	2436	1912	74	25	79	48	-4.84834	1.8106e-11	8.21297e-09	-4.80443	4.75827e-32	5.18128e-28
Gzmc	159	595	279	61	138	70	59	59	19	12	11	1	-4.9025	5.04623e-11	2.15434e-08	-2.84347	1.55459e-07	3.67998e-05
H2-Aa	1146	8078	10841	2207	2781	3120	3552	3589	787	158	133	308	-4.18339	5.26556e-11	2.20475e-08	-3.14549	4.89929e-11	4.26787e-08
Cxcl9	539	888	543	165	945	138	123	65	32	25	15	6	-4.97248	5.62543e-11	2.31099e-08	-3.87309	1.4624e-07	3.53868e-05
Clec7a	70	177	551	365	215	350	555	482	28	7	10	5	-4.31824	7.4251e-11	2.88691e-08	-4.97899	6.35619e-25	2.7685e-21
Tnip3	13	138	246	17	17	20	67	32	1	1	2	4	-5.95234	9.05616e-11	3.34203e-08	-3.94362	2.25838e-07	5.17716e-05
Klrd1	64	185	164	90	72	33	46	21	12	16	1	4	-3.96971	3.19771e-10	1.03349e-07	-2.66588	3.60494e-05	0.00331259
H2-Ab1	1038	5271	7659	1203	1915	2327	2756	2202	694	193	110	235	-3.83081	3.19261e-10	1.03349e-07	-2.76697	1.06259e-08	3.4031e-06
Itgae	167	634	381	118	220	113	127	158	56	30	14	17	-3.65893	4.26753e-10	1.29051e-07	-2.33187	3.23414e-08	9.02989e-06
Sirpb1a	38	415	418	109	569	174	383	235	19	9	7	3	-4.84267	5.50364e-10	1.64152e-07	-4.95463	1.32384e-17	2.88306e-14
Cd226	8	205	433	53	72	45	190	60	1	0	6	6	-5.94737	6.33675e-10	1.8396e-07	-4.69491	5.69456e-11	4.76985e-08
Ctsw	50	243	114	37	64	13	34	43	16	11	4	3	-3.90338	1.25534e-09	3.29331e-07	-2.1649	0.000241101	0.0136382
Pck1	4313	9208	6902	1554	2925	391	493	766	633	204	79	63	-4.70585	1.25543e-09	3.29331e-07	-2.3177	0.00113595	0.0398369
Igfl3	33	19	25	12	16	112	136	83	227	612	201	506	4.01831	2.64556e-09	6.54566e-07	2.40902	0.000267987	0.0145179
Dusp2	544	677	525	116	561	74	60	143	34	53	28	16	-4.04757	3.32641e-09	7.87237e-07	-2.53227	7.76426e-05	0.00585087
Sprr2b	3	0	2	3291	1502	754	2649	1767	87	39	334	723	7.59221	3.32008e-09	7.87237e-07	-2.74412	6.23992e-05	0.00494157
Trgc4	22	43	49	15	18	8	20	19	5	0	1	0	-4.56229	5.24515e-09	1.15356e-06	-3.41341	4.59127e-05	0.00392112
Napsa	43	146	151	129	128	102	125	122	25	6	16	7	-2.9693	6.7176e-09	1.44814e-06	-3.1617	2.21429e-16	4.38388e-13
Mmp12	579	314	443	285	54	124	116	122	76	29	30	31	-3.31536	9.56786e-09	1.98401e-06	-1.7499	0.000354193	0.0177325
Nnat	365	937	786	500	325	53	26	52	33	37	31	32	-4.28753	1.2965e-08	2.61377e-06	-2.50105	0.00062619	0.0264799
Ly6c2	35	606	267	208	1240	42	111	140	8	2	7	8	-5.49988	3.34429e-08	5.77898e-06	-5.78494	6.02381e-12	5.70376e-09
S100a8	176	147	559	90802	27054	21498	28848	24245	2497	5664	6282	10141	4.48907	3.61289e-08	6.14106e-06	-2.6323	1.49267e-07	3.57225e-05
Slc9a4	17	53	90	21	8	31	18	8	4	0	3	3	-4.31543	3.79773e-08	6.36062e-06	-2.78344	0.000228426	0.0131954
H2-DMb1	169	582	892	212	292	378	521	394	113	51	93	65	-2.667	4.7781e-08	7.82207e-06	-2.16106	5.99059e-10	2.83615e-07
Itgax	149	340	354	98	175	165	192	203	61	15	4	22	-3.37105	4.9689e-08	7.955e-06	-2.71736	1.36516e-06	0.000232268
Il2rb	73	433	270	169	237	73	160	79	49	9	11	9	-3.63774	4.94771e-08	7.955e-06	-2.87947	6.14699e-07	0.000112495
Mgl2	131	971	2360	218	45	151	492	293	40	23	51	102	-4.3215	6.89878e-08	1.0653e-05	-2.15721	0.000361749	0.0179759
Cd52	185	785	782	424	732	471	835	685	120	54	71	42	-2.92794	7.38066e-08	1.12377e-05	-3.13359	2.17518e-18	5.26345e-15
Nkg7	24	162	72	21	65	17	28	29	11	9	2	1	-3.81179	7.53876e-08	1.13612e-05	-2.47645	0.000197537	0.0119168
Cd69	28	273	99	66	80	55	45	25	17	10	11	15	-3.23501	7.80464e-08	1.15599e-05	-2.02894	1.60032e-06	0.000263497
Slamf7	35	425	397	59	203	60	110	59	29	2	17	24	-3.89255	1.1119e-07	1.56189e-05	-2.44601	6.02628e-05	0.00482501
Cd244a	35	276	227	98	136	68	120	135	19	8	15	33	-3.16154	1.17577e-07	1.64103e-05	-2.56862	2.05294e-10	1.17655e-07
Ptpn22	74	337	317	172	187	106	234	137	55	27	28	22	-2.78293	1.9297e-07	2.52865e-05	-2.34136	8.78518e-11	6.34012e-08
Flt3	27	85	51	32	48	74	63	39	8	3	8	5	-3.07504	2.54705e-07	3.26217e-05	-3.09532	1.06375e-10	6.61895e-08
Mmp25	15	149	119	60	84	57	41	61	9	4	7	11	-3.50938	3.61698e-07	4.39958e-05	-2.96203	3.72725e-13	4.27222e-10
Lce1c	404	1525	1147	1905	1188	1170	2962	1965	4240	2809	4183	5321	2.11332	4.27262e-07	5.09124e-05	1.17003	0.000472408	0.0217507
Traf1	85	228	216	129	176	108	141	103	52	44	47	57	-1.71779	5.65388e-07	6.51333e-05	-1.39169	4.88375e-08	1.28143e-05
Grap2	33	329	310	63	141	100	108	80	41	20	12	23	-3.13267	5.82855e-07	6.64424e-05	-2.04025	2.76313e-07	6.02876e-05
Cdh17	16	46	26	6	9	9	9	10	1	0	0	1	-5.77222	6.28036e-07	7.08509e-05	-4.10381	0.000427401	0.0205473
Cnr1	82	138	141	41	74	81	52	56	21	14	17	34	-2.38206	6.3582e-07	7.08966e-05	-1.50106	5.42742e-05	0.00446032
Gpr18	3	70	65	30	74	30	51	25	2	3	1	1	-4.62471	8.80376e-07	9.39629e-05	-4.58535	1.0354e-10	6.61895e-08
Cd96	9	113	90	25	47	17	28	29	12	5	5	1	-3.52619	1.01294e-06	0.000105023	-2.34048	4.62543e-05	0.00393487
Gpr55	8	54	44	20	28	16	19	11	4	0	2	3	-3.87556	1.09367e-06	0.000112323	-3.05982	6.16266e-06	0.000808497
Icos	36	192	188	117	168	74	154	86	18	11	11	20	-3.1134	1.38444e-06	0.000133378	-2.99747	6.20608e-15	9.654e-12
Cd83	89	220	362	47	104	215	227	79	50	24	15	25	-2.8793	1.51057e-06	0.000142379	-2.25378	2.27037e-05	0.00226808
Gbp6	127	547	309	67	246	86	116	59	43	42	45	44	-2.81319	1.54129e-06	0.000144649	-1.39745	0.00150521	0.0493421
Klra7	7	57	30	10	45	1	24	26	0	0	1	0	-6.59356	1.59706e-06	0.000149239	-6.12207	5.15605e-06	0.000695404
Ccl5	29	160	80	44	146	27	63	32	13	0	6	0	-4.13889	1.87694e-06	0.000168871	-3.70827	2.08967e-05	0.00213554
Wdfy1	460	410	391	452	324	325	356	286	807	794	669	922	1.03249	1.93965e-06	0.000173082	1.19689	5.74587e-10	2.78074e-07
Gm15459	4812	8853	8258	10642	10774	382	4006	381	436	491	476	655	-3.72542	1.99067e-06	0.000175477	-3.33237	2.69457e-05	0.00258513
Casp4	1010	2204	2022	2009	1859	402	421	413	288	274	225	337	-2.53511	2.23858e-06	0.000192651	-1.84637	0.00052118	0.0231273
S100a9	188	253	668	103052	37365	17465	17898	26684	1935	1906	8750	11250	4.12008	2.33124e-06	0.000198274	-2.73959	2.31906e-05	0.00230615
Gpr171	44	218	197	164	177	136	64	88	35	7	9	26	-2.89783	2.35807e-06	0.000199001	-2.70526	6.62369e-08	1.71727e-05
Nmrk2	14	12	26	0	0	25	26	18	398	735	295	55	4.51837	2.67148e-06	0.000221164	4.72915	0.00051675	0.0231084
Ankk1	0	0	1	222	117	57	64	68	16	17	32	54	6.48688	2.87445e-06	0.000236172	-1.81261	0.00048947	0.0221615
Il7r	120	540	546	161	193	149	129	118	108	37	28	55	-2.72677	2.99106e-06	0.000242812	-1.3971	0.000330306	0.0169516
Lce1b	232	1441	1493	2433	1513	1300	3281	2360	4635	3629	4630	5412	2.21383	2.99609e-06	0.000242812	1.07247	0.000432572	0.0207021
Clec4b1	7	152	256	30	105	75	317	74	6	2	11	7	-4.30998	3.02066e-06	0.000242812	-4.21745	1.16067e-09	4.86098e-07
Iglv2	0	0	4	124	33	2	17	0	0	0	0	0	-17.5732	3.0167e-06	0.000242812	-7.5548	0.00117884	0.0409455
Gzma	2	114	65	87	141	15	89	23	0	0	3	0	-6.22042	3.13332e-06	0.000248985	-6.54861	2.42669e-09	9.42674e-07
Matk	36	71	51	31	25	51	50	53	10	8	6	16	-2.29513	3.38356e-06	0.000263427	-2.07464	2.55715e-06	0.00039218
H2-DMa	154	695	1047	252	294	521	705	490	183	70	92	65	-2.52977	4.21465e-06	0.000319741	-2.1493	2.97923e-07	6.36095e-05
Gm42031	0	5	5	2	2	3	1	1	119	6	71	26	4.15901	4.47618e-06	0.000337231	4.95236	1.01853e-08	3.31066e-06
Fcrl5	3	275	131	10	212	59	204	86	1	6	3	0	-5.67524	4.80416e-06	0.000357	-5.51839	6.37466e-10	2.90274e-07
Sh2d1b1	11	164	84	40	131	81	140	61	7	13	5	1	-3.63977	5.05942e-06	0.000373419	-3.80751	7.36004e-11	5.52714e-08
F10	16	60	85	90	40	28	76	87	9	0	5	2	-3.64664	5.99083e-06	0.00043335	-3.99682	6.5996e-10	2.93319e-07
Lce1i	71	592	515	1143	853	438	1141	1021	1391	1115	3117	3390	2.62347	6.35794e-06	0.000455367	1.30287	0.0015346	0.0499559
Bcl2a1d	31	84	63	63	39	46	75	52	8	0	6	16	-2.88191	6.61609e-06	0.000472302	-2.87529	4.48469e-07	8.96032e-05
Adgre4	10	207	397	44	92	284	412	217	14	6	24	13	-3.74252	6.75887e-06	0.000477795	-3.88641	5.0367e-10	2.49294e-07
Tlr11	3	77	84	8	27	9	39	7	2	0	4	3	-4.50151	7.04284e-06	0.000495665	-3.00249	0.000453904	0.0211673
Ifi208	19	618	262	31	560	12	115	24	2	10	4	1	-6.04775	7.90797e-06	0.000539806	-5.11898	4.41783e-07	8.93821e-05
Gbp2b	0	77	88	1	27	2	30	2	0	0	1	0	-7.40947	8.36407e-06	0.000562071	-5.36314	0.0004644	0.0215644
Amz1	35	130	137	40	39	92	81	85	28	24	20	12	-2.16372	9.79129e-06	0.000655956	-1.6863	5.26739e-05	0.0043452
Prtn3	46	75	102	106	42	36	12	26	15	3	13	1	-3.10891	1.12206e-05	0.000733654	-2.44996	0.0010791	0.0387159
P2ry10	51	240	325	58	151	184	118	94	52	8	24	20	-2.88571	1.19528e-05	0.000767695	-2.22235	1.29973e-05	0.00148196
Parvg	82	92	55	44	76	33	52	89	33	20	11	8	-1.97991	1.34133e-05	0.000839216	-1.70606	0.000353602	0.0177325
Atp8b4	40	326	242	192	226	138	268	185	33	26	35	42	-2.47788	1.33899e-05	0.000839216	-2.56791	4.78181e-19	1.48769e-15
Syt14	13	6	15	10	5	4	15	14	1	0	0	0	-5.11468	1.45831e-05	0.000896944	-4.98312	5.62347e-05	0.00460406
Ciita	42	355	493	77	142	330	549	281	69	21	16	28	-3.05817	1.49583e-05	0.000917428	-3.05904	1.92924e-07	4.46969e-05
Card11	30	67	50	15	44	18	70	5	9	1	2	1	-3.81576	1.53807e-05	0.000940687	-3.2382	0.000234721	0.0134875
Gpr141	37	457	535	221	277	100	144	219	64	37	18	52	-2.9161	1.60525e-05	0.000973566	-2.16564	1.1402e-07	2.82173e-05
Ifi214	0	65	16	2	45	8	13	10	0	0	0	0	-7.10301	1.64792e-05	0.000988436	-6.40264	3.37515e-06	0.000490027
Calhm6	34	100	110	37	81	80	112	74	14	15	18	20	-2.17868	1.69147e-05	0.001009	-2.20053	1.59629e-08	4.89634e-06
Pdcd1lg2	9	14	38	10	4	4	17	12	0	2	0	0	-5.24691	1.82007e-05	0.00107453	-4.23422	0.000814716	0.031571
Sirpb1b	0	92	128	138	164	80	142	148	5	1	6	3	-4.19067	1.82108e-05	0.00107453	-5.15709	1.92801e-26	1.11189e-22
Ikzf3	14	153	79	40	65	41	111	69	15	0	4	5	-3.67945	2.3225e-05	0.00129661	-3.44797	9.8327e-08	2.46134e-05
Ipcef1	6	124	122	57	69	61	127	88	3	0	16	3	-3.81939	2.36684e-05	0.00130134	-3.85781	6.47835e-09	2.27557e-06
Slamf8	38	95	94	18	43	40	103	55	13	0	13	10	-2.96568	2.49135e-05	0.00133936	-2.52916	0.000249749	0.014013
Adgrg5	25	106	51	33	48	24	57	50	19	4	3	4	-2.9222	2.65982e-05	0.00141595	-2.50265	1.34077e-05	0.00151146
Spn	34	561	333	148	433	190	345	235	47	6	59	26	-3.06039	2.75115e-05	0.00145744	-2.96206	4.40309e-08	1.18383e-05
Ltb	17	56	37	26	61	25	30	57	7	2	10	3	-2.63026	2.77341e-05	0.00146566	-2.84439	4.04092e-07	8.30217e-05
Rhox10	14	16	2	8	8	11	20	16	34	54	41	56	2.22697	3.04215e-05	0.00156588	1.8734	2.93072e-06	0.00043716
Gbp8	31	204	204	49	164	109	290	137	25	14	10	10	-3.2184	3.08748e-05	0.00158173	-3.35512	1.48862e-10	8.76193e-08
Rnase6	13	154	164	46	122	56	208	88	17	10	17	7	-3.01524	3.67701e-05	0.0018387	-3.03171	8.5506e-09	2.86484e-06
Klrc2	8	35	22	10	17	7	20	4	2	0	2	2	-3.75051	3.98891e-05	0.00197837	-2.95153	0.000719099	0.0292697
Ms4a4b	30	297	157	51	204	46	95	43	7	0	28	17	-3.52212	4.19393e-05	0.00203081	-2.74067	0.000415501	0.0200848
Gm9733	9	36	21	40	79	20	35	61	1	1	0	0	-5.36069	4.65412e-05	0.00221254	-6.54705	6.10777e-09	2.21692e-06
Slc29a3	1034	2218	1929	1715	1570	949	1192	925	562	220	611	749	-1.58394	5.12677e-05	0.00240054	-1.23803	0.0006471	0.027049
Mefv	21	123	99	156	114	84	57	126	23	5	4	0	-3.24957	5.25911e-05	0.00242599	-3.74083	3.66317e-08	1.00983e-05
AI504432	34	186	167	62	103	83	102	89	44	31	24	14	-2.09631	5.28244e-05	0.0024316	-1.63727	3.82047e-06	0.000547383
Cytip	156	539	611	515	367	706	336	425	163	41	55	98	-2.19209	5.31902e-05	0.00244327	-2.39814	6.71954e-09	2.32283e-06
Sh2d2a	16	93	51	38	82	17	43	18	13	6	7	4	-2.73285	5.37783e-05	0.00246012	-2.39598	6.02366e-05	0.00482501
Gbp2	501	3328	2042	452	2071	752	836	603	267	108	467	370	-2.58575	5.86119e-05	0.00260973	-1.62863	0.00138678	0.0465352
Dtx3l	649	2510	1786	571	1847	818	952	630	285	168	441	484	-2.15409	6.07294e-05	0.00268207	-1.47883	0.000540951	0.0237326
Acsm5	5	22	16	26	7	17	10	11	0	0	1	2	-4.15446	7.16704e-05	0.00311473	-4.23534	3.66802e-05	0.00332842
Cxcr6	35	105	115	129	114	98	169	184	22	24	4	15	-2.29582	7.24429e-05	0.00314203	-3.09881	1.76365e-13	2.40055e-10
Cd72	72	865	394	103	727	147	204	281	95	6	52	23	-3.23599	7.82278e-05	0.00335286	-2.72413	9.83865e-05	0.00691181
Mup17	7	1490	6	0	0	726	1922	41	0	0	0	1	-10.5948	8.36468e-05	0.00354327	-11.1091	0.000393393	0.0192821
Zc3h12d	20	121	91	16	104	61	89	71	12	2	15	13	-2.77772	0.000101111	0.00410726	-2.69854	7.10704e-06	0.000899867
Lrmda	18	41	54	26	25	45	50	47	4	8	11	11	-2.04392	0.000108246	0.0043484	-2.18357	1.74547e-06	0.000281577
Cxcr2	5	15	27	834	364	263	268	650	35	31	57	292	2.8253	0.000113646	0.00451537	-2.18877	0.000699244	0.0288959
Clnk	4	20	17	4	12	3	7	15	1	0	0	0	-5.39542	0.000121475	0.00473143	-4.75147	0.000203989	0.0121821
Tagap	15	163	98	78	110	91	166	80	26	12	13	23	-2.22017	0.000123609	0.00480208	-2.51046	6.87002e-11	5.52714e-08
Il18rap	33	152	133	361	126	108	141	223	26	12	16	14	-2.54319	0.000124041	0.0048056	-3.48469	2.63616e-15	4.41618e-12
AA467197	29	106	98	141	180	16	23	44	11	5	9	1	-3.47736	0.000124611	0.00481055	-3.61402	3.99485e-06	0.000565101
Gzmb	22	153	111	57	268	14	76	4	12	0	7	2	-4.08283	0.000135894	0.00513686	-3.98549	0.000124615	0.00829928
Fcrla	4	11	8	4	20	5	12	12	0	0	0	0	-5.2791	0.000138893	0.00519607	-5.84662	3.99603e-06	0.000565101
Skap1	10	43	43	15	28	16	19	18	9	5	7	3	-2.31544	0.000144739	0.00535954	-1.67456	0.000786248	0.0308521
Gdf3	2	9	23	7	4	7	15	17	0	0	0	0	-5.84919	0.000148763	0.00546209	-5.76583	4.57865e-06	0.000628554
Lingo3	20	7	11	10	4	16	14	8	145	66	32	40	2.58841	0.000150841	0.0055105	2.75693	7.6295e-07	0.000138463
Scimp	11	135	84	43	126	48	52	101	16	2	6	18	-2.77491	0.000151774	0.00551681	-2.81485	8.40091e-07	0.000149963
Samd3	1	18	19	6	19	2	12	4	0	0	1	0	-5.2887	0.000159449	0.00576693	-4.82327	0.000291481	0.0156351
Tarm1	3	58	36	92	40	40	29	65	6	0	1	4	-3.4639	0.000165501	0.00596597	-4.2656	9.31599e-11	6.34012e-08
Klri2	1	40	36	18	17	2	26	4	2	0	2	0	-4.58247	0.000173517	0.0062138	-3.73887	0.000711216	0.029097
Rasal3	36	119	87	79	97	46	112	71	38	22	20	13	-1.69639	0.000174316	0.00623214	-1.80043	5.12826e-06	0.000695404
Myh8	247	47	95	36	40	86	86	240	9655	2013	113	78	4.62081	0.000175576	0.00625666	4.91536	6.69217e-05	0.00520507
Psors1c2	172	72	100	862	4046	1251	1332	1537	107	307	682	765	2.1436	0.00021838	0.00744098	-1.94595	0.000712127	0.029097
Klra8	9	30	19	28	10	5	24	7	2	0	1	1	-4.17196	0.000217838	0.00744098	-3.88319	8.94527e-05	0.00652663
Klra2	4	321	229	167	303	58	135	114	9	0	20	21	-3.78158	0.000222706	0.00757653	-3.62149	1.18121e-07	2.89037e-05
Uox	11	0	5	949	633	985	350	771	43	15	155	189	4.36678	0.000226132	0.00766913	-2.86271	1.6092e-06	0.000263497
A530010L16Rik	5	29	34	13	7	7	66	20	2	0	3	1	-3.81448	0.000232316	0.00783005	-3.92064	6.57283e-05	0.00513058
Ly6a2	0	23	6	17	45	7	18	30	0	0	0	0	-5.62027	0.000233571	0.00786019	-6.98321	7.19468e-09	2.44821e-06
Il12b	5	18	14	11	6	4	13	2	1	0	0	0	-5.24574	0.00024724	0.00824371	-4.56924	0.00048218	0.022052
Il2ra	13	182	198	83	75	101	104	66	28	35	25	23	-2.14565	0.0002482	0.00826309	-1.6299	1.52675e-08	4.74995e-06
Eomes	0	22	14	10	24	1	12	3	0	0	0	0	-5.93324	0.00026728	0.00877752	-5.75834	5.7062e-05	0.00465429
Opn3	141	75	102	83	100	101	114	66	33	36	50	37	-1.32736	0.000288001	0.009286	-1.24885	1.04108e-05	0.00122927
Gm39556	11	29	19	16	12	12	15	18	0	0	5	5	-2.86597	0.00030488	0.00973335	-2.53713	0.000584301	0.0250984
Siglech	13	52	45	30	43	50	60	27	10	0	13	4	-2.33455	0.000309585	0.00981958	-2.63422	2.09848e-05	0.00213554
Slfn1	23	823	584	479	880	135	274	396	16	3	86	53	-3.48222	0.000310168	0.00981958	-3.42909	1.84424e-06	0.000295323
Tgtp2	29	561	309	94	343	98	177	97	55	17	65	40	-2.65829	0.000315301	0.00990629	-1.863	0.000253283	0.0140212
Alox15	9	122	74	7	26	80	165	120	2	2	15	5	-3.39776	0.000362544	0.0110401	-3.72802	1.0369e-05	0.00122927
Myl4	77	20	17	11	8	42	27	67	1531	185	42	14	3.65167	0.00036562	0.0110718	3.82488	0.00152075	0.0495976
Coro2a	175	355	315	218	370	194	283	247	131	64	123	124	-1.2454	0.000380499	0.0113332	-1.24377	3.41482e-05	0.0031646
Gm43735	18	36	24	11	22	16	68	23	144	136	63	232	2.56525	0.000398713	0.0117472	2.34353	2.07132e-05	0.0021278
Gpr183	25	141	138	31	80	104	102	99	19	11	24	36	-2.07152	0.000417385	0.0121331	-1.88998	3.56224e-05	0.00328722
Chit1	588	1003	711	832	721	595	866	931	1559	864	1536	2740	1.2316	0.00042106	0.0122074	1.08841	0.000803397	0.0312994
Jaml	51	259	220	491	238	105	112	134	48	24	33	55	-2.0462	0.00049787	0.0138976	-2.41839	1.22962e-06	0.000210856
Klrc1	7	91	50	40	55	14	37	16	5	3	15	6	-2.6595	0.000610892	0.0164616	-2.14571	0.000435801	0.0207021
Trdc	45	196	211	77	51	108	137	181	65	13	9	28	-2.30017	0.000618974	0.0165972	-1.95454	0.000607689	0.0259495
Il1b	79	238	326	4698	1100	877	954	1284	46	14	57	56	-2.20551	0.000645861	0.0171701	-5.34359	3.48953e-21	1.26658e-17
Dock8	738	1470	1381	735	1466	906	1477	1110	659	581	458	497	-1.02438	0.000659003	0.0174344	-1.05588	9.55385e-05	0.00681577
Cd300e	0	417	183	19	241	90	326	112	4	0	15	1	-5.20526	0.000694683	0.0182233	-4.9691	3.1458e-08	8.89729e-06
AW112010	71	423	349	159	314	195	244	133	31	44	112	86	-1.93546	0.000719639	0.0187425	-1.60749	0.000154602	0.00978754
H19	2119	2985	3663	713	1206	3765	2241	4566	23954	11430	5657	6042	2.10559	0.000726832	0.0188846	2.22689	0.000113037	0.0076214
Gm19951	15	49	21	174	79	17	57	96	1	0	10	1	-3.11895	0.000783942	0.0198937	-4.78459	1.8658e-08	5.64353e-06
Klrb1f	6	58	52	21	30	12	82	11	2	6	5	8	-2.78402	0.000786845	0.0199441	-2.58185	0.000357766	0.0178293
Spib	9	37	10	8	28	10	18	5	4	2	2	2	-2.80004	0.000820231	0.0207052	-2.46594	0.00114215	0.0399899
Tnni1	97	6	16	25	44	55	50	68	1091	276	60	27	3.31117	0.000854344	0.0212833	2.8982	0.000235545	0.0134992
Bcl2a1a	0	46	28	41	25	25	39	30	4	5	3	3	-2.62462	0.000956547	0.0234273	-3.09104	1.03783e-09	4.43173e-07
Cst7	20	59	41	24	34	32	36	39	15	5	17	9	-1.69263	0.000969049	0.0236803	-1.51668	0.000298733	0.0158292
Rgs1	74	219	134	468	158	127	115	136	63	34	24	12	-2.00132	0.00100576	0.0243316	-2.58229	2.08403e-06	0.000328884
Isg20	129	279	170	99	279	151	223	169	96	44	79	62	-1.35053	0.00111454	0.0263483	-1.38975	0.000146052	0.00939627
Trdv4	15	41	71	47	6	41	69	45	15	9	3	5	-2.31203	0.00117573	0.0273437	-2.38735	0.000321742	0.0166622
Gpr82	0	15	46	17	10	21	45	21	0	0	3	3	-3.65883	0.00139475	0.0311147	-3.92884	3.37071e-06	0.000490027
Itgb7	63	320	204	118	213	250	288	238	85	48	78	30	-1.59823	0.00142024	0.0315218	-1.87803	8.69302e-07	0.000153916
Nfkbie	84	209	246	107	118	158	182	183	77	23	80	70	-1.41915	0.00148325	0.0325881	-1.25745	0.000961766	0.0359886
Gm16867	3	4	4	11	17	4	9	9	0	0	0	0	-4.21089	0.0015678	0.0338984	-5.75756	2.72208e-06	0.000414556
Casq2	202	116	344	114	124	217	219	162	2357	932	264	179	2.17445	0.00161533	0.034685	2.46769	8.01904e-05	0.00598078
Klra17	0	31	18	23	14	17	27	58	1	0	4	0	-3.60033	0.00167087	0.0354926	-4.4624	5.05112e-07	9.87582e-05
Slc14a1	113	309	554	80	81	357	530	150	47	64	101	56	-2.1755	0.00173732	0.0364418	-1.84882	0.00146423	0.0483884
Slamf9	38	836	739	70	512	215	632	232	64	36	137	68	-2.713	0.00176087	0.0367589	-2.12191	0.000295951	0.0158292
Arpp21	50	22	45	6	17	29	57	30	251	202	52	60	1.95828	0.00177798	0.0369411	2.32694	0.000232367	0.0133876
Ighd	13	25	58	11	18	41	116	11	9	0	2	3	-3.09761	0.00183263	0.0377501	-3.51633	0.000149328	0.00948125
Mup7	16	28	13	0	1	114	52	419	0	0	0	1	-5.86324	0.00183532	0.0377697	-8.59022	0.000227171	0.0131578
Inpp5j	68	65	17	53	47	31	28	27	16	17	14	11	-1.67345	0.00185185	0.0380021	-1.35271	0.000350509	0.0176699
Clec12a	13	517	497	119	485	435	1122	497	99	23	50	9	-2.82586	0.00189551	0.0387158	-3.56413	8.22436e-08	2.08267e-05
Siglecg	7	36	18	3	7	20	57	29	1	0	6	0	-3.42202	0.00200755	0.0400646	-3.7257	0.000634267	0.0267177
Lilra6	5	97	83	31	40	55	267	79	2	1	9	18	-2.93904	0.00203553	0.0404745	-3.66754	5.664e-06	0.000752137
Cd300c	0	8	3	11	11	8	5	6	0	0	0	0	-4.21856	0.00214356	0.0422751	-5.47157	7.23398e-06	0.000910646
Gm12439	31	14	24	11	10	17	8	20	134	96	23	33	1.73838	0.00224062	0.043597	2.43323	1.62007e-05	0.00175532
Slc38a4	234	314	304	141	129	227	216	303	812	426	467	410	1.00022	0.0023227	0.044675	1.37808	4.70341e-05	0.00395486
Stap1	31	180	184	53	85	124	199	93	44	8	45	32	-1.92741	0.00235185	0.0451559	-1.78486	0.000591116	0.0253412
Ube2l6	414	1201	950	218	914	602	1045	586	234	168	364	235	-1.66595	0.00248344	0.0468562	-1.4274	0.000984381	0.0364589
Gm48065	0	39	20	17	10	3	26	12	3	0	1	3	-3.39769	0.00267997	0.049576	-2.96028	0.000759381	0.0301235

## Sheet: Supplementary table3
Supplementary table3 Primer sequences
Name	sequence (5'-3')
TCN2-KO-F	CCGGCGTGGTGGACAAACTTCTGTACTCGAGTACAGAAGTTTGTCCACCACGTTTTTG
TCN2-KO-R	CCGGCGTGGTGGACAAACTTCTGTACTCGAGTACAGAAGTTTGTCCACCACGTTTTTG
h-ACTB-F	CATGTACGTTGCTATCCAGGC
h-ACTB-R	CTCCTTAATGTCACGCACGAT
h-TCN2-F	CAGAACAGTGCGAGAGGAGATC
h-TCN2-R	TCGCCTTGAGACATGCTGTTCC
h-IL-1β-F	CCACAGACCTTCCAGGAGAATG
h-IL-1β-R	GTGCAGTTCAGTGATCGTACAGG
h-IL-6-F	CCTGAACCTTCCAAAGATGGC
h-IL-6-R	TTCACCAGGCAAGTCTCCTCA
h-TNFα-F	CTCTTCTGCCTGCTGCACTTTG
h-TNFα-R	ATGGGCTACAGGCTTGTCACTC
h-S100A7-F	AGAAGCCAAGCCTGCTGACGAT
h-S100A7-R	GTCCTTTTTCTCAAAGACATCGGC
h-S100A8-F	ATTGCCGACAGGATGCAGA
h-S100A8-R	GAGTACTTGCGCTCAGGAGGA
h-S100A9-F	GACTACCACAAGCAGAGCCAT
h-S100A9-R	GACATTTTATTGTTCCTGGGGTCT
h-IL12R-F	TAGGGACCTGAGATGCTATCG
h-IL12R-R	CCCGGAGCTAAGGCAACAC
h-LCN2-F	CCTCCCTGAAAACCACATCG
h-LCN2-R	AGATGGGGACAGCAGAATAAAG
m-Actb-F	GCCTTCCTTCTTGGGTATGGAA
m-Actb-R	CAGCTCAGTAACAGTCCGCC
m-Il-1β-F	TGCCACCTTTTGACAGTGATG
m-Il-1β-R	AAGGTCCACGGGAAAGACAC
m-S100a8-F	GGAAATCACCATGCCCTCTACAA
m-S100a8-R	ATGCCACACCCACTTTTATCACC
m-S100a9-F	GGAGCGCAGCATAACCACCATC
m-S100a9-R	GCCATCAGCATCATACACTCCTCA
